# Supplementary material for: Oncolysis with DTT-205 and DTT-304 generates immunological memory in cured animals
Source: PubMed Central journal article supplement (PMC6199251; doi:10.1038/s41419-018-1127-3), 2018-10-23
Supplement: 41419_2018_1127_MOESM3_ESM.pdf [file 41419_2018_1127_MOESM3_ESM.pdf]

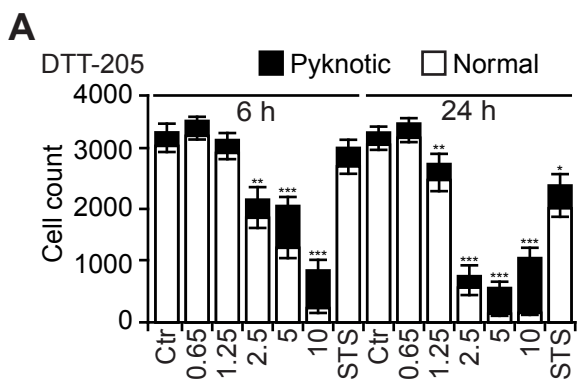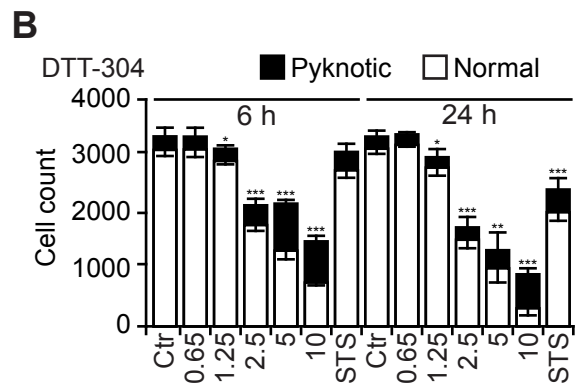

**Figure S3**
